# Supplementary material for: Studies of adsorption of α,β-unsaturated carbonyl compounds on heterogeneous Au/CeO2, Au/TiO2 and Au/SiO2 catalysts during reduction by hydrogen
Source: Royal Society of Chemistry journal article supplement (doi:10.1039/d1ra09434c), 2022-01-01
Supplement: d1ra09434c1.pdf [file d1ra09434c1.pdf]

Electronic Supplementary Information

to article entitled”

“Studies of adsorption of  $\alpha,\beta$ -unsaturated carbonyl compounds  
on heterogeneous Au/CeO<sub>2</sub>, Au/TiO<sub>2</sub> and Au/SiO<sub>2</sub> catalysts  
during reduction by hydrogen”

by

Maciej Zielinski,\*<sup>a</sup> Wojciech Juszczyk<sup>a</sup> and Zbigniew Kaszukur<sup>a</sup>

<sup>a</sup> Institute of Physical Chemistry, Polish Academy of Sciences,  
ul. M. Kasprzaka 44/52, Warszawa, Poland

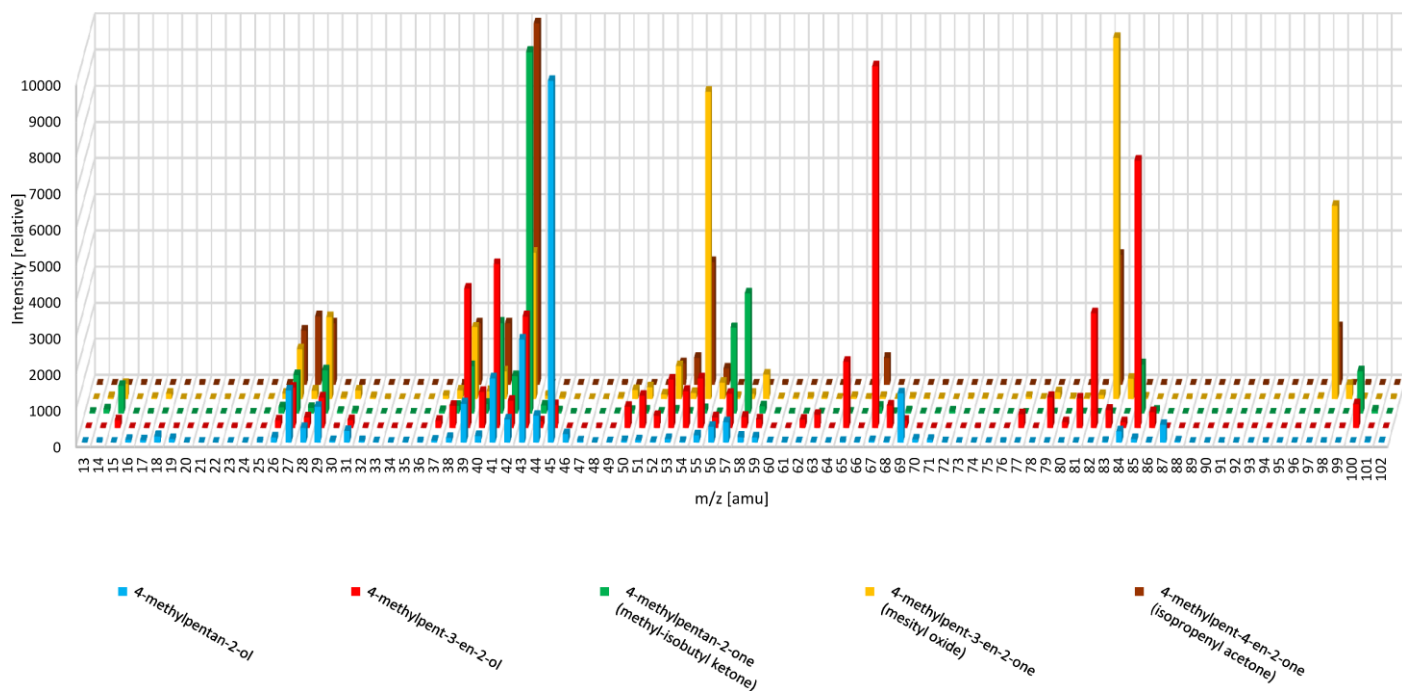

**Figure S 1.** The bar chart presenting the reference mass spectrometry signals (atomic mass units [amu] divided by the ion charge,  $m/z$ ) and their intensities of mesityl oxide (4-methylpent-3-en-2-one) and its hydrogenation derivatives as reported by National Institute of Standards and Technology (NIST, <https://webbook.nist.gov>).

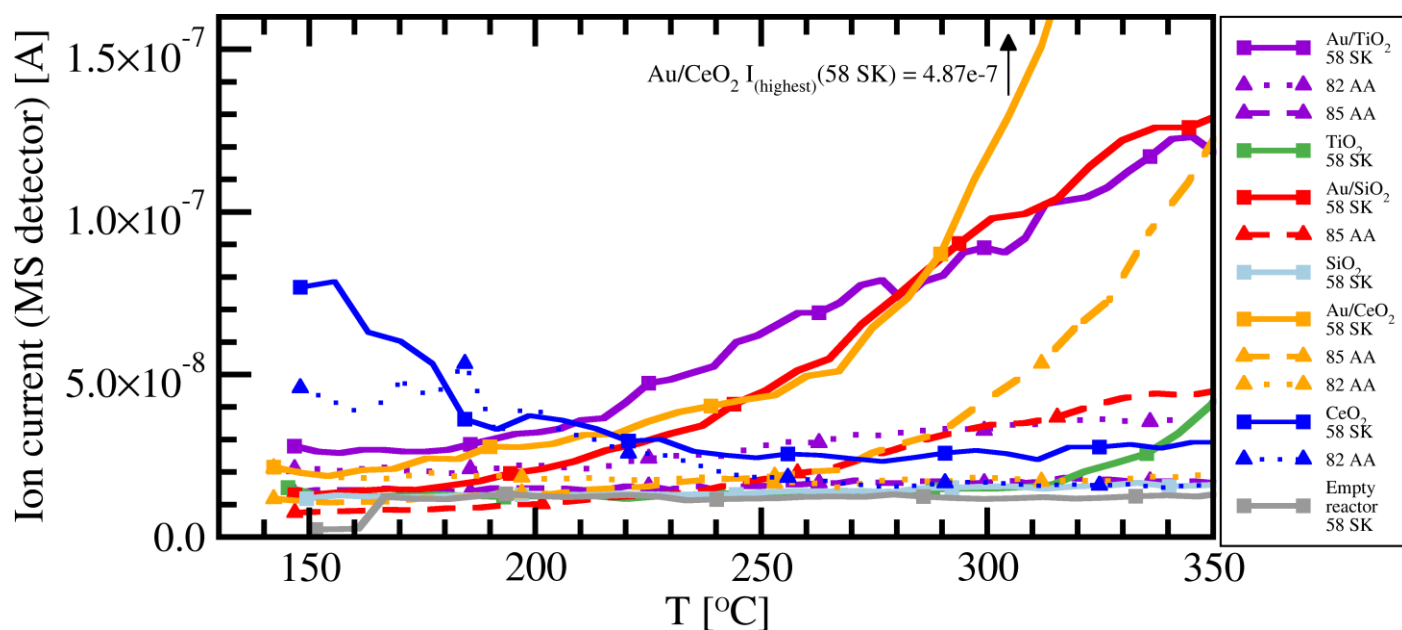

**Figure S 2.** The plot presenting changes of intensity (ion current) of mass spectrometry signals while probing the outlet stream of the reactor fed with vapours of mesityl oxide and a  $H_2/He$  mixture. The reactor's bed was filled with a layer of a catalyst or a pure oxide support. According to Figure S 1 signal  $m/z = 58$  amu best represents the concentration of sole saturated ketone (SK, i.e. 4-methylpentan-2-one also known as methyl-isobutyl ketone). Signals  $m/z = 82$  and  $85$  amu best represent the concentration of sole allylic alcohol (4-methylpent-3-en-2-ol).

**Table S 1.** Summary of the composition analysed by gas chromatography of the outlet stream of the reactor containing a layer of a catalyst fed with vapours of mesityl oxide ( $\alpha$ -MesOx, 4-methylpent-3-en-2-one,  $\alpha$  isomer C=C double bond position) and a H<sub>2</sub>/He mixture. Meaning of the abbreviations in the columns headers: SK = saturated ketone (4-methylpentan-2-one, methyl-isobutyl ketone); SA = saturated alcohol (4-methylpentan-2-ol); AA = allyl alcohol (4-methylpent-3-en-2-ol); iso =  $\beta$  isomer of MesOx (4-methylpent-4-en-2-one, isopropenyl acetone)

| Sample                                   | % FID signal (peak) area |      |      |       |                 | Conversion of $\alpha$ -MesOx [%] |
|------------------------------------------|--------------------------|------|------|-------|-----------------|-----------------------------------|
|                                          | SK                       | SA   | AA   | iso   | $\alpha$ -MesOx |                                   |
| 8.7% <sub>wt.</sub> Au/CeO <sub>2</sub>  | 15.20                    | 0.00 | 0.00 | 9.13  | 75.67           | 24.33                             |
| 0.5% <sub>wt.</sub> Au/TiO <sub>2</sub>  | 3.41                     | 0.00 | 0.00 | 12.72 | 83.87           | 16.13                             |
| 10.0% <sub>wt.</sub> Au/SiO <sub>2</sub> | 4.86                     | 0.00 | 0.00 | 5.01  | 90.14           | 9.86                              |
